# Supplementary material for: Octosporaconidiophora (Pyronemataceae) – a new species from South Africa and the first report of anamorph in bryophilous Pezizales
Source: MycoKeys. 2019 Jun 10;54:49–76. doi: 10.3897/mycokeys.54.34571 (PMC6579791; doi:10.3897/mycokeys.54.34571)
Supplement: Supplementary material 1 [file mycokeys-54-049-s002.xls]

## Sheet: dist-matrices
Sochorová et al.: Octospora conidiophora (Pyronemataceae) – a new species from South Africa and the first report of anamorph in bryophilous Pezizales
Supplementary material 1, Table S1: Distance matrices (nucleotide difference) for each locus of Octospora conidiophora agg. and several randomly selected taxa.
LSU (left below) / SSU (right above)	ZE63_18 O. conidiophora	ZE37_18 O. conidiophora	ZE56_18 O. conidiophora	ZE69_18 O. conidiophora	Oct-Jat O. kelabitiana	OLOi O. ithacaensis	HR8 O. orthotrichi	LMSk L. miniata	OP1 O. pseudoampezzana	OExc O. excipulata	46853 N. rutilans
ZE63_18 Octospora conidiophora	-	5	59	55	62	30	22	38	32	44	37
ZE37_18 Octospora conidiophora	18	-	56	52	59	27	17	33	29	44	32
ZE56_18 Octospora conidiophora	54	51	-	9	25	76	64	83	75	90	79
ZE69_18 Octospora conidiophora	53	49	14	-	16	72	59	78	70	86	74
Oct-Jat Octospora kelabitiana	65	62	66	71	-	80	67	87	77	94	84
OLOi Octospora ithacaensis	102	96	119	117	133	-	19	41	37	46	37
HR8 Octospora orthotrichi	96	89	107	107	123	53	-	31	23	38	28
LMSk Lamprospora miniata	204	198	207	208	206	179	180	-	37	47	37
OP1 Octospora pseudoampezzana	115	109	127	127	150	72	67	174	-	41	24
OExc Octospora excipulata	144	141	161	161	179	100	106	202	89	-	40
46853 Neottiella rutilans	167	164	172	172	188	141	143	197	117	137	-
EFa	ZE63_18 O. conidiophora	ZE37_18 O. conidiophora	ZE56_18 O. conidiophora	ZE69_18 O. conidiophora	Oct-Jat O. kelabitiana	OLOi O. ithacaensis	HR8 O. orthotrichi	LMSk L. miniata	OP1 O. pseudoampezzana	OExc O. excipulata	46853 N. rutilans
ZE63_18 Octospora conidiophora	-
ZE37_18 Octospora conidiophora	19	-
ZE56_18 Octospora conidiophora	25	24	-
ZE69_18 Octospora conidiophora	26	26	4	-
Oct-Jat Octospora kelabitiana	33	32	19	19	-
OLOi Octospora ithacaensis	143	138	140	141	144	-
HR8 Octospora orthotrichi	89	88	89	91	95	134	-
LMSk Lamprospora miniata	87	90	93	96	101	137	88	-
OP1 Octospora pseudoampezzana	92	95	97	98	104	142	102	101	-
OExc Octospora excipulata	90	88	94	95	100	141	101	100	98	-
46853 Neottiella rutilans	98	98	103	102	109	157	102	97	99	94	-
